# Supplementary material for: Spatial Modeling of Extreme Temperature in Northeast Thailand
Source: MDPI journal article supplement (doi:10.3390/atmos13040589), 2022-04-06
Supplement: s1 [file s1]

# Supplementary Material: Spatial Modeling of Extreme Temperature in Northeast Thailand

Prapawan Senapeng<sup>1</sup>, Thanawan Prahadchai<sup>2</sup>, Pannarat Guayjarernpanishk<sup>3</sup>,  
Jeong-Soo Park<sup>2</sup> and Piyapatr Busababodhin<sup>1,\*</sup>

*1: Digital Innovation Research Cluster for Integrated Disaster Management in the Watershed, Mahasarakham University, Kantharawichai, Maha Sarakham 44150, Thailand.*

*2: Department of Mathematics and Statistics, Chonnam National University, Gwangju 500-757, Korea.*

*3: Faculty of Interdisciplinary Studies, Nong Khai Campus, Khon Kaen University, Nong Khai 43000, Thailand*

*\*: Corresponding author, E-mail: piyapatr.b@msu.ac.th, Tel: +66-92-542-6396*

April 6, 2022

# 1. Data

In this study, we use the daily maximum temperature data were observed between 1989 and 2019 for 25 stations. Figure S1 shows the location of 25 observation weather stations in the northeast region of Thailand. Table S1 shows locations of temperature monitoring station and the height above sea level for 25 stations.

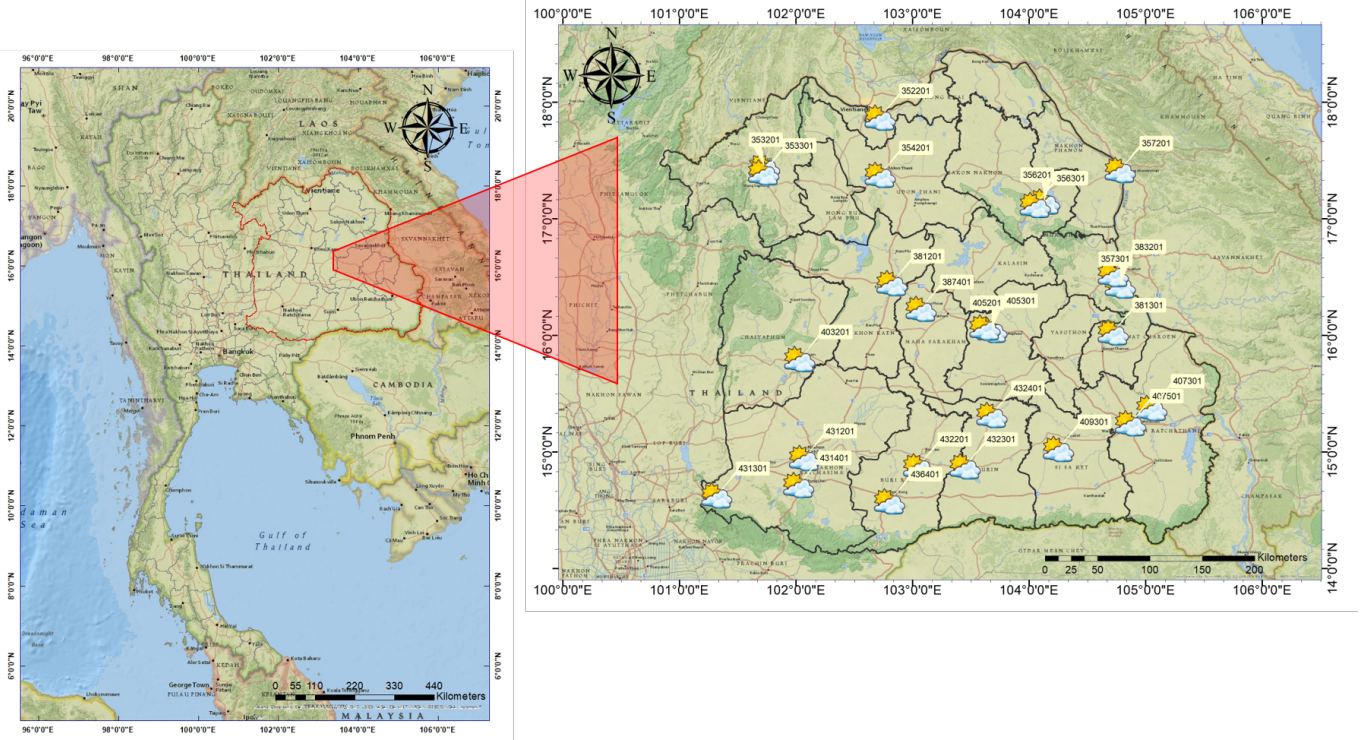

Figure S 1: The locations of 25 observation weather stations in the northeast region of Thailand.

Table S 1: Location of temperature monitoring station and the height above sea level for 25 stations in the northeastern region of Thailand.

| ID     | Name                    | Latitude | Longitude | Altitude (m) |
|--------|-------------------------|----------|-----------|--------------|
| 352201 | Nong Khai               | 17°52'   | 102°43'   | 167          |
| 353201 | Loei                    | 17°27'   | 101°44'   | 246          |
| 353301 | Loei Agromet            | 17°24'   | 101°43'   | 311          |
| 354201 | Udonthani               | 17°23'   | 102°43'   | 177          |
| 356201 | Sakon Nakhon            | 17°09'   | 104°08'   | 168          |
| 356301 | Sakon Nakhon Agromet    | 17°07'   | 104°03'   | 238          |
| 357201 | Nakhon Phanom           | 17°25'   | 104°47'   | 141          |
| 357301 | Nakhon Phanom Agromet   | 16°26'   | 104°47'   | 142          |
| 381201 | Khon Kaen               | 16°27'   | 102°49'   | 168          |
| 381301 | Tahpra Agromet          | 16°20'   | 104°43'   | 171          |
| 383201 | Mukdaharn               | 16°32'   | 104°43'   | 162          |
| 387401 | Maha Sarakham           | 16°14'   | 103°04'   | 161          |
| 403201 | Chaiyaphum              | 15°48'   | 102°02'   | 209          |
| 405201 | Roiet                   | 16°03'   | 103°41'   | 147          |
| 405301 | Roiet Agromet           | 16°04'   | 103°37'   | 161          |
| 407301 | Ubon Ratchatani Agromet | 15°23'   | 105°03'   | 118          |
| 407501 | Ubon Ratchatani         | 15°15'   | 104°52'   | 126          |

Table S 1 : *Continued from previous page*

| ID     | Name              | Latitude | Longitude | Altitude (m) |
|--------|-------------------|----------|-----------|--------------|
| 409301 | Si Sa Ket         | 15°02'   | 104°15'   | 134          |
| 431201 | Nakhon Ratchasima | 14°57'   | 102°04'   | 204          |
| 431301 | Pak Chong Agromet | 14°38'   | 101°19'   | 551          |
| 431401 | Chok Chai         | 14°43'   | 102°10'   | 187          |
| 432201 | Surin             | 14°53'   | 103°30'   | 147          |
| 432301 | Surin Agromet     | 14°53'   | 103°27'   | 144          |
| 432401 | Tha Tum           | 15°19'   | 103°41'   | 144          |
| 436401 | Nang Rong         | 14°35'   | 102°48'   | 185          |

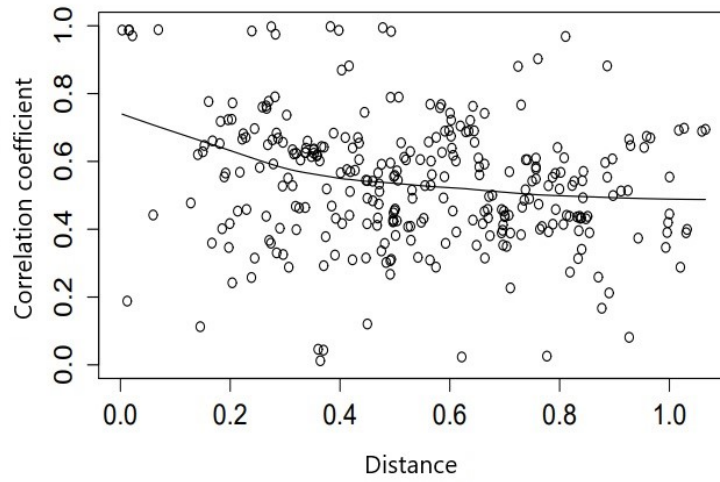

Figure S 2: Scatter plot of Spearman's correlation coefficients versus Euclidian distances obtained between every two station in the northeast region of Thailand.

The scatter plot of Spearman's correlation coefficients versus Euclidian distances obtained between every two stations is provided in Figure 2. There is moderate spatial dependence, approximately between 0.5 to 0.8, for the annual maximum daily temperature data, suggesting that spatial modeling might be good than independent modeling.

## 2. Results

### 2..1 The generalized extreme value (GEV) distribution

Table S 2: Point parameter estimates and in the 95 confidence interval, appropriate distribution and p-value of Kolmogorov-Smirnov (KS) test of each station from local GEV.

| Station | Parameter estimate             |                             |                                | Distribution | p-value of KS |
|---------|--------------------------------|-----------------------------|--------------------------------|--------------|---------------|
|         | $\hat{\mu}(\text{s.e})$        | $\hat{\sigma}(\text{s.e})$  | $\hat{\xi}(\text{s.e})$        |              |               |
|         | CI 95%                         | CI 95%                      | CI 95%                         |              |               |
| 352201  | 40.49 (0.22)<br>(40.05, 40.92) | 1.07 (0.17)<br>(0.75, 1.40) | -0.21 (0.17)<br>(-0.54, 0.12)  | Gumbel       | 0.57          |
| 353201  | 40.19 (0.24)<br>(39.72, 40.66) | 1.15 (0.18)<br>(0.79, 1.51) | -0.33 (0.18)<br>(-0.69, 0.03)  | Gumbel       | 0.96          |
| 353301  | 40.12 (0.23)<br>(39.67, 40.57) | 1.12 (0.17)<br>(0.78, 1.45) | -0.31 (0.16)<br>(-0.63, 0.00)  | Gumbel       | 0.91          |
| 354201  | 40.51 (0.21)<br>(40.09, 40.93) | 1.08 (0.15)<br>(0.79, 1.38) | -0.35 (0.11)<br>(-0.57, -0.13) | Weibull      | 0.99          |
| 356201  | 39.81 (0.24)<br>(39.35, 40.27) | 1.18 (0.23)<br>(0.73, 1.64) | -0.77 (0.20)<br>(-1.16, -0.38) | Weibull      | 0.86          |
| 356301  | 39.79 (0.21)<br>(39.38, 40.19) | 1.05 (0.17)<br>(0.71, 1.39) | -0.57 (0.14)<br>(-0.85, -0.29) | Weibull      | 0.78          |
| 357201  | 39.04 (0.24)<br>(38.57, 39.52) | 1.16 (0.18)<br>(0.79, 1.52) | -0.23 (0.18)<br>(-0.58, 0.12)  | Gumbel       | 0.85          |
| 357301  | 39.08 (0.24)<br>(38.61, 39.55) | 1.15 (0.18)<br>(0.80, 1.50) | -0.24 (0.17)<br>(-0.57, 0.09)  | Gumbel       | 0.86          |
| 381201  | 40.53 (0.17)<br>(40.19, 40.86) | 0.83 (0.14)<br>(0.56, 1.10) | -0.44 (0.18)<br>(-0.80, -0.08) | Weibull      | 0.80          |
| 381301  | 40.51 (0.17)<br>(40.17, 40.84) | 0.85 (0.13)<br>(0.60, 1.09) | -0.29 (0.14)<br>(-0.57, -0.02) | Weibull      | 0.97          |
| 383201  | 40.25 (0.18)<br>(39.90, 40.60) | 0.90 (0.14)<br>(0.63, 1.17) | -0.52 (0.14)<br>(-0.79, -0.24) | Weibull      | 0.76          |
| 387401  | 40.56 (0.18)<br>(40.19, 40.92) | 0.87 (0.16)<br>(0.56, 1.17) | -0.48 (0.21)<br>(-0.89, -0.06) | Weibull      | 0.68          |

Table S 2: *Continue.*

| Station | Parameter estimate                 |                              |                                | Distribution | p-value of KS |
|---------|------------------------------------|------------------------------|--------------------------------|--------------|---------------|
|         | $\hat{\mu}(\mathbf{s.e})$          | $\hat{\sigma}(\mathbf{s.e})$ | $\hat{\xi}(\mathbf{s.e})$      |              |               |
|         | CI 95%                             | CI 95%                       | CI 95%                         |              |               |
| 403201  | 39.89 (0.18)<br>(39.53, 40.25)     | 0.90 (0.14)<br>(0.63, 1.17)  | -0.31 (0.16)<br>(-0.62, 0.01)  | Gumbel       | 0.76          |
| 405201  | 39.83 (0.21)<br>(39.43, 40.23)     | 1.01 (0.15)<br>(0.72, 1.31)  | -0.31 (0.14)<br>(-0.59, -0.03) | Weibull      | 0.99          |
| 405301  | 39.86 (0.20)<br>(39.47, 40.24)     | 1.00 (0.15)<br>(0.71, 1.29)  | -0.39 (0.13)<br>(-0.64, -0.14) | Weibull      | 0.95          |
| 407301  | 39.84 (0.19)<br>(39.47, 40.22)     | 0.94 (0.14)<br>(0.66, 1.21)  | -0.23 (0.14)<br>(-0.51, 0.06)  | Gumbel       | 0.99          |
| 407501  | 39.87 (0.19)<br>(39.49, 40.24)     | 0.94 (0.14)<br>(0.66, 1.23)  | -0.34 (0.15)<br>(-0.63, -0.04) | Weibull      | 0.99          |
| 409301  | 39.72 (0.19)<br>(39.36, 40.08)     | 0.94 (0.13)<br>(0.69, 1.19)  | -0.22 (0.10)<br>(-0.42, -0.01) | Weibull      | 0.69          |
| 431201  | 40.02 (0.21)<br>(39.61, 40.43)     | 1.08 (0.15)<br>(0.78, 1.38)  | -0.45 (0.10)<br>(-0.64, -0.25) | Weibull      | 0.98          |
| 431301  | 38.47 (0.19)<br>(38.09, 38.84)     | 0.97 (0.14)<br>(0.70, 1.24)  | -0.38 (0.12)<br>(-0.61, -0.14) | Weibull      | 0.89          |
| 431401  | 39.25 (0.15)<br>(38.95, 39.55)     | 0.73 (0.11)<br>(0.52, 0.95)  | -0.22 (0.16)<br>(-0.52, 0.09)  | Gumbel       | 0.96          |
| 432201  | 39.05 (0.15)<br>(38.75, 39.36)     | 0.76 (0.11)<br>(0.55, 0.98)  | -0.18 (0.13)<br>(-0.44, 0.08)  | Gumbel       | 0.92          |
| 432301  | 39.91 (0.20)<br>(39.52, 40.30)     | 1.00(0.15)<br>(0.70, 1.31)   | -0.46 (0.14)<br>(-0.74, -0.19) | Weibull      | 0.95          |
| 432401  | 40.4214 (0.2341)<br>(39.96, 40.88) | 1.13 (0.17)<br>(0.79, 1.47)  | -0.24 (0.16)<br>(-0.56, 0.08)  | Gumbel       | 0.75          |
| 436401  | 40.25 (0.21)<br>(39.85, 40.65)     | 1.02 (0.17)<br>(0.68, 1.36)  | -0.60 (0.17)<br>(-0.93, -0.26) | Weibull      | 0.80          |

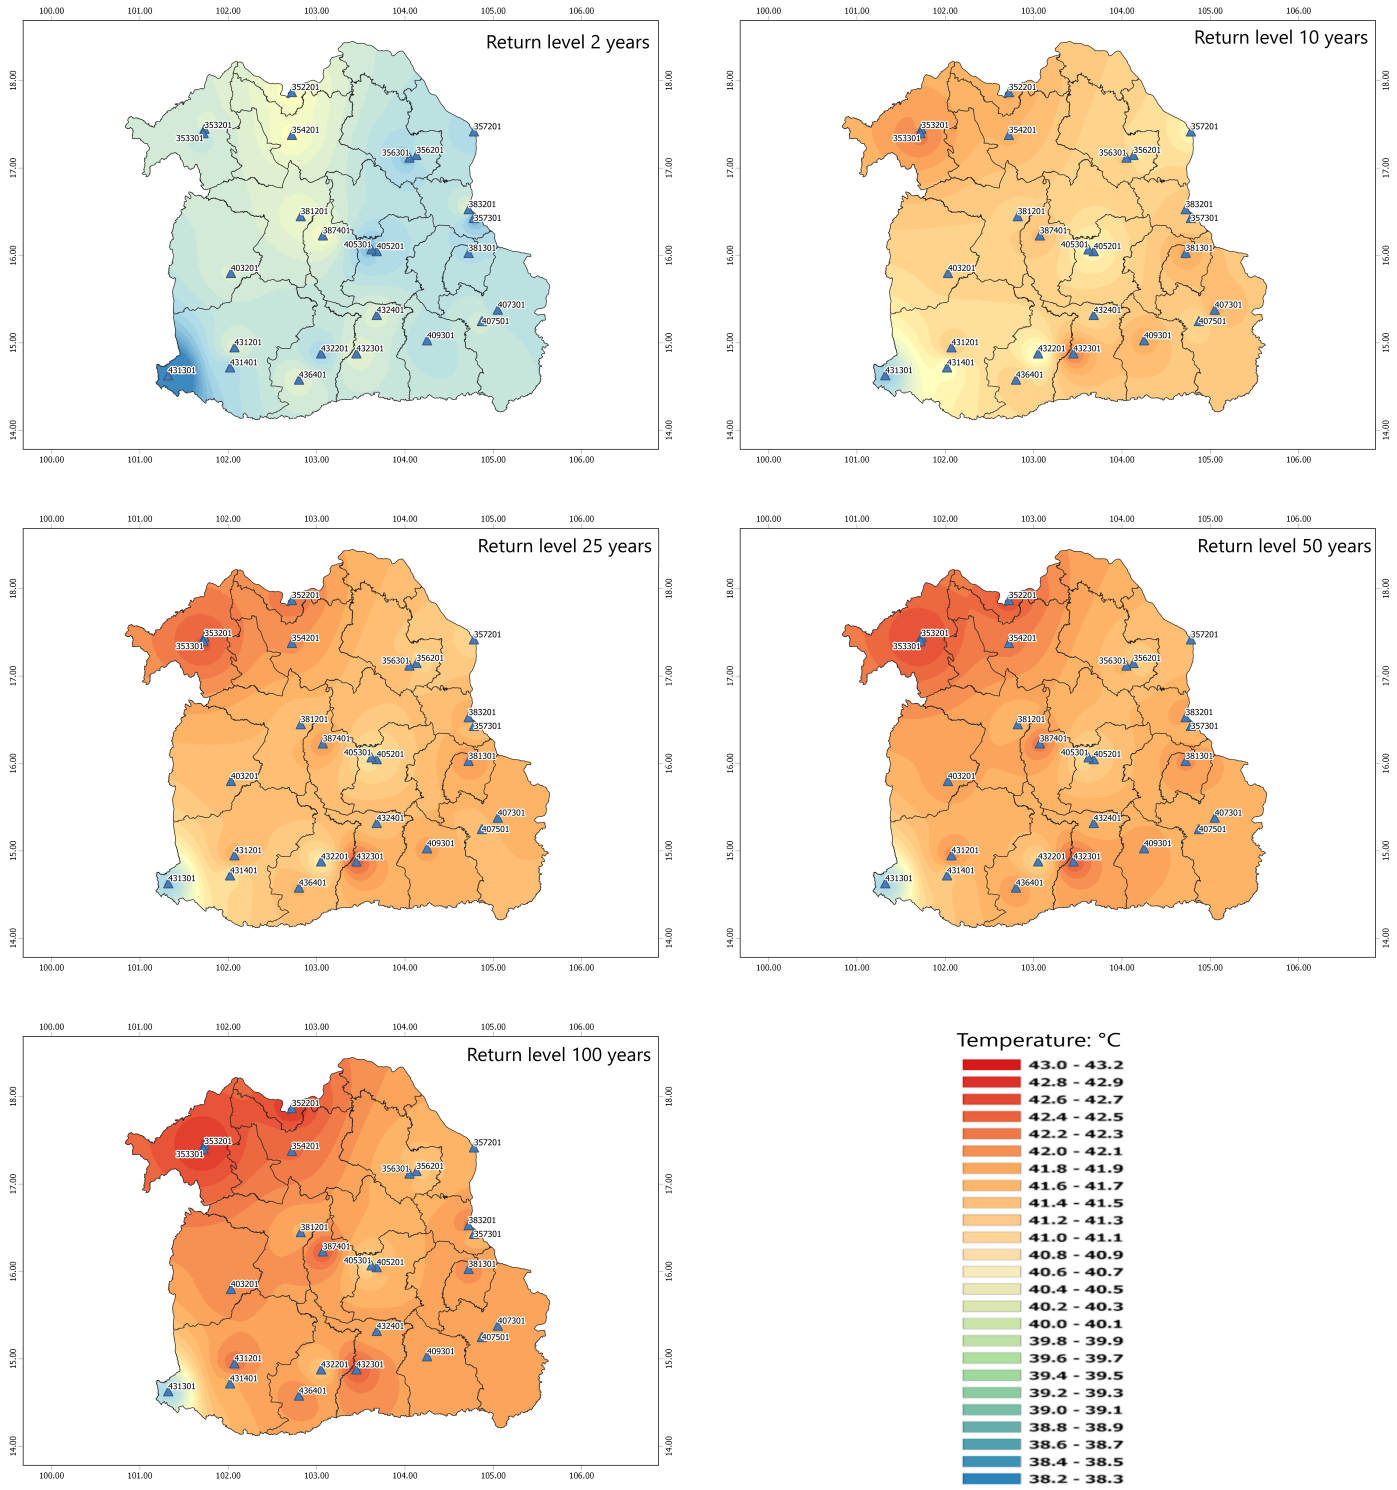

Figure S 3: The return level maps for 25 stations correspond to 2, 10, 25, 50, and 100 years return periods in northeast region of Thailand (unit: °C). The return levels are obtained from local GEV models.

## 2..2 The spatial generalized extreme value distribution

Table S 3: The return levels (unit:  $^{\circ}C$ ) for 200 return period year ( $T = 200$ ) of each station from spatial generalized extreme value distribution.

| station ID | Station Name            | 200 years |
|------------|-------------------------|-----------|
| 352201     | Nong Khai               | 43.46     |
| 353201     | Loei                    | 42.94     |
| 353301     | Loei Agromet            | 42.87     |
| 354201     | Udonthani               | 43.28     |
| 356201     | Sakon Nakhon            | 42.78     |
| 356301     | Sakon Nakhon Agromet    | 42.61     |
| 357201     | Nakhon Phanom           | 42.84     |
| 357301     | Nakhon Phanom Agromet   | 42.76     |
| 381201     | Khon Kaen               | 43.31     |
| 381301     | Tahpra Agromet          | 43.17     |
| 383201     | Mukdaharn               | 42.75     |
| 387401     | Maha Sarakham           | 43.32     |
| 403201     | Chaiyaphum              | 43.20     |
| 405201     | Roiet                   | 43.04     |
| 405301     | Roiet Agromet           | 42.92     |
| 407301     | Ubon Ratchatani Agromet | 42.36     |
| 407501     | Ubon Ratchatani         | 42.59     |
| 409301     | Si Sa Ket               | 42.78     |
| 431201     | Nakhon Ratchasima       | 42.89     |
| 431301     | Pak Chong Agromet       | 41.51     |
| 431401     | Chok Chai               | 42.83     |
| 432201     | Surin                   | 42.80     |
| 432301     | Surin Agromet           | 42.85     |
| 432401     | Tha Tum                 | 43.01     |
| 436401     | Nang Rong               | 42.68     |

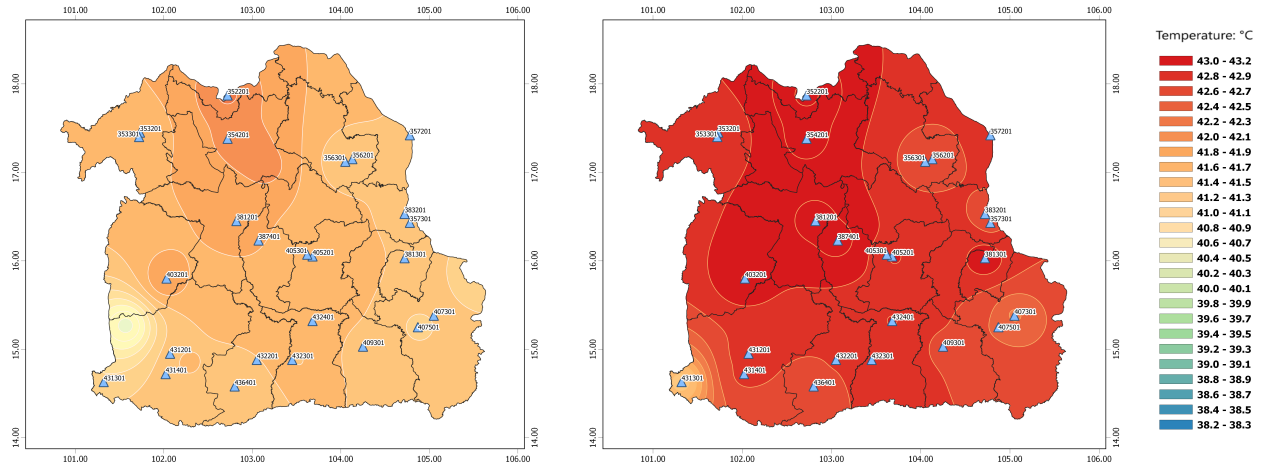

Figure S 4: The return level maps for 25 stations correspond to 5 years (left) and 200 years (right) return periods in northeast region of Thailand (unit:  $^{\circ}\text{C}$ ). The return levels are obtained from Max-stable process models.
